# Supplementary material for: Therapeutic Outcomes of Patients with Multifocal Papillary Thyroid Microcarcinomas and Larger Tumors
Source: Hindawi journal article supplement (doi:10.1155/2017/4208178), 2017-01-01
Supplement: f1 [file 4208178.f1.pdf]

**SUPPLEMENTAL TABLE A. Clinical features of multifocal and solitary larger papillary thyroid carcinoma.**

| <b>Clinical characteristic</b>                                  | <b>Multifocal</b>             | <b>Solitary</b>               | <b><i>p</i> value</b> |
|-----------------------------------------------------------------|-------------------------------|-------------------------------|-----------------------|
| Patient number                                                  | 479                           | 1,490                         |                       |
| Gender, Female                                                  | 383 (80.0)                    | 1,141 (76.6)                  | 0.124                 |
| Age at diagnosis (year)                                         | 46.3 ± 14.1                   | 42.2 ± 14.2                   | <0.001                |
| Age ≥ 45 yrs.                                                   | 265 (55.3)                    | 605 (40.6)                    | <0.001                |
| 1-month postoperative serum Tg level (ng/mL)                    | 150.3 ± 941.6                 | 171.8 ± 2143.2                | 0.835                 |
| Operative method                                                |                               |                               |                       |
| Total thyroidectomy                                             | 465 (97.1)                    | 1,359 (91.2)                  | <0.001                |
| TNM stage                                                       |                               |                               |                       |
| Stage I                                                         | 268 (55.9)                    | 996 (66.8)                    | <0.001                |
| Stage II                                                        | 56 (11.7)                     | 173 (11.6)                    | 0.962                 |
| Stage III                                                       | 55 (11.5)                     | 111 (7.4)                     | 0.006                 |
| Stage IV                                                        | 100 (20.9)                    | 210 (14.1)                    | <0.001                |
| Non-remission                                                   | 113 (23.6)                    | 232 (15.6)                    | <0.001                |
| Residual                                                        | 70 (14.6)                     | 130 (8.7)                     | <0.001                |
| Relapsed                                                        | 43 (9.0)                      | 102 (6.8)                     | 0.120                 |
| Follow-up period (year)                                         | 7.2 ± 5.4                     | 10.6 ± 7.2                    | <0.001                |
| Post-operative <sup>131</sup> I accumulative dose (mCi) [range] | 165.9 ± 233.0<br>[0.0-2050.0] | 139.2 ± 196.3<br>[0.0-2787.1] | 0.014                 |
| <sup>131</sup> I ≥ 30 mCi                                       | 442 (92.3)                    | 1383 (92.8)                   | 0.691                 |
| <sup>131</sup> I < 30 mCi                                       | 37 (7.7)                      | 107 (7.2)                     |                       |
| Radiation therapy                                               | 23 (4.8)                      | 79 (5.3)                      | 0.667                 |
| 2 <sup>nd</sup> primary cancer                                  | 38 (7.9)                      | 101 (6.8)                     | 0.391                 |
| Diabetes mellitus                                               | 49 (10.2)                     | 106 (7.1)                     | 0.028                 |
| Overall mortality                                               | 41 (8.6)                      | 156 (10.5)                    | 0.225                 |
| Cancer mortality                                                | 21 (4.4)                      | 82 (5.5)                      | 0.339                 |
| Disease free                                                    | 163 (34.0)                    | 642 (43.1)                    | <0.001                |
| Lymph node metastasis                                           | 164 (34.2)                    | 344 (23.1)                    | <0.001                |
| Soft tissue invasion                                            | 139 (29.0)                    | 351 (23.6)                    | 0.016                 |
| Distant metastasis                                              | 34 (7.1)                      | 66 (4.4)                      | 0.021                 |

Number (%); Mean ± SD

**SUPPLEMENTAL TABLE B. Multivariate analysis by Cox proportional hazards regression model for survival and mortality of all 2,536 PTC patients.**

|                                                                 | $\beta$ coefficient | Hazard ratio | 95% confidence interval |             | <i>p</i> value |
|-----------------------------------------------------------------|---------------------|--------------|-------------------------|-------------|----------------|
|                                                                 |                     |              | Lower bound             | Upper bound |                |
| Age (year)                                                      | .015                | 1.015        | 1.012                   | 1.019       | 0.0000         |
| Sex (Female vs. Male)                                           | .123                | 1.131        | 1.020                   | 1.255       | 0.0200         |
| Tumor size (cm)                                                 | -.098               | .906         | .879                    | .935        | 0.0000         |
| Post-operative serum Tg level after 1 month (ng/mL)             | .000                | 1.000        | 1.000                   | 1.000       | 0.4423         |
| Metastases (lymph node/soft tissue invasion/distant metastases) | -.019               | .981         | .935                    | 1.029       | 0.4235         |

**SUPPLEMENTAL TABLE C. Clinical features of multifocal papillary thyroid cancer undergoing total thyroidectomy or less than total thyroidectomy surgery.**

| <b>Clinical characteristic</b>                          | <b>All patients</b> | <b>Total thyroidectomy</b> | <b>Less than total thyroidectomy</b> | <b><i>p</i> value</b> |
|---------------------------------------------------------|---------------------|----------------------------|--------------------------------------|-----------------------|
| Patient number                                          | 626 (100.0)         | 595 (95.0)                 | 31 (5.0)                             |                       |
| Gender, Female                                          | 499 (79.7)          | 472 (79.3)                 | 27 (87.1)                            | 0.294                 |
| Age at diagnosis (year)                                 | 46.5 ± 13.5         | 46.6 ± 13.5                | 44.4 ± 14.7                          | 0.379                 |
| Mean tumor size (cm)                                    | 2.1 ± 1.4           | 2.1 ± 1.4                  | 1.1 ± 0.8                            | <0.001                |
| 1-month postoperative serum Tg level (ng/mL)            | 184.2 ± 1551.1      | 182.3 ± 1579.6             | 221.4 ± 804.5                        | 0.895                 |
| TNM stage                                               |                     |                            |                                      |                       |
| Stage I                                                 | 390 (62.3)          | 363 (61.0)                 | 27 (87.1)                            | 0.003                 |
| Stage II                                                | 58 (9.3)            | 57 (9.6)                   | 1 (3.2)                              | 0.234                 |
| Stage III                                               | 67 (10.7)           | 66 (11.1)                  | 1 (3.2)                              | 0.167                 |
| Stage IV                                                | 111 (17.7)          | 109 (18.3)                 | 2 (6.5)                              | 0.092                 |
| Non-remission                                           | 131 (20.9)          | 127 (21.3)                 | 4 (12.9)                             | 0.260                 |
| Follow-up period (year)                                 | 7.1 ± 5.3           | 7.1 ± 5.4                  | 7.3 ± 4.3                            | 0.866                 |
| Post-operative <sup>131</sup> I accumulative dose (mCi) | 153.7 ± 222.2       | 157.4 ± 225.0              | 82.9 ± 140.4                         | 0.069                 |
| Radiation therapy                                       | 28 (4.5)            | 28 (4.7)                   | -                                    | 0.217                 |
| 2 <sup>nd</sup> primary cancer                          | 49 (7.8)            | 45 (7.6)                   | 4 (12.9)                             | 0.281                 |
| Diabetes mellitus                                       | 61 (9.7)            | 59 (9.9)                   | 2 (6.5)                              | 0.526                 |
| Overall mortality                                       | 49 (7.8)            | 48 (8.1)                   | 1 (3.2)                              | 0.328                 |
| Cancer mortality                                        | 25 (4.0)            | 25 (4.2)                   | -                                    | 0.244                 |
| Disease free                                            | 221 (35.3)          | 214 (36.0)                 | 7 (22.6)                             | 0.128                 |
| Lymph node metastasis                                   | 197 (31.5)          | 196 (32.9)                 | 1 (3.2)                              | 0.001                 |
| Soft tissue invasion                                    | 153 (24.4)          | 152 (25.5)                 | 1 (3.2)                              | 0.005                 |
| Distant metastasis                                      | 39 (6.2)            | 38 (6.4)                   | 1 (3.2)                              | 0.478                 |

Number (%); Mean ± SD

**SUPPLEMENTAL TABLE D. Clinical features of multifocal or solitary papillary thyroid microcarcinoma.**

| <b>Clinical characteristic</b>                                  | <b>Multifocal</b> | <b>Solitary</b> | <b><i>p</i> value</b> |
|-----------------------------------------------------------------|-------------------|-----------------|-----------------------|
| Patient number                                                  | 147               | 420             |                       |
| Gender, Female                                                  | 116 (78.9)        | 356 (84.8)      | 0.102                 |
| Age at diagnosis (year)                                         | 47.1 ± 11.4       | 44.8 ± 12.8     | 0.055                 |
| Age ≥ 45 yrs.                                                   | 90 (61.2)         | 214 (51.0)      | 0.032                 |
| 1-month postoperative serum Tg level (ng/mL)                    | 296.5 ± 2725.5    | 62.2 ± 811.0    | 0.132                 |
| Operative method                                                |                   |                 |                       |
| Total thyroidectomy                                             | 130 (88.4)        | 237 (56.4)      | <0.001                |
| TNM stage                                                       |                   |                 |                       |
| Stage I                                                         | 122 (83.0)        | 386 (91.9)      | 0.002                 |
| Stage II                                                        | 2 (1.4)           | 2 (0.5)         | 0.270                 |
| Stage III                                                       | 12 (8.2)          | 17 (4.0)        | 0.051                 |
| Stage IV                                                        | 11 (7.5)          | 15 (3.6)        | 0.051                 |
| Non-remission                                                   | 18 (12.2)         | 18 (4.3)        | 0.001                 |
| Residual                                                        | 13 (8.8)          | 9 (2.1)         | <0.001                |
| Relapsed                                                        | 5 (3.4)           | 9 (2.1)         | 0.397                 |
| Follow-up period (year)                                         | 6.6 ± 5.1         | 8.9 ± 6.4       | <0.001                |
| Post-operative <sup>131</sup> I accumulative dose (mCi) [range] | 114.3 ± 176.7     | 65.5 ± 160.2    | 0.002                 |
| <sup>131</sup> I ≥ 30 mCi                                       | 127 (86.4)        | 248 (59.0)      | <0.001                |
| <sup>131</sup> I < 30 mCi                                       | 20 (13.6)         | 172 (41.0)      |                       |
| Radiation therapy                                               | 5 (3.4)           | 7 (1.7)         | 0.209                 |
| 2 <sup>nd</sup> primary cancer                                  | 11 (7.5)          | 30 (7.1)        | 0.891                 |
| Diabetes mellitus                                               | 12 (8.2)          | 43 (10.2)       | 0.464                 |
| Overall mortality                                               | 8 (5.4)           | 22 (5.2)        | 0.924                 |
| Cancer mortality                                                | 4 (2.7)           | 2 (0.5)         | 0.022                 |
| Disease free                                                    | 58 (39.5)         | 119 (28.3)      | 0.012                 |
| Lymph node metastasis                                           | 33 (22.4)         | 40 (9.5)        | <0.001                |
| Soft tissue invasion                                            | 14 (9.5)          | 16 (3.8)        | 0.008                 |
| Distant metastasis                                              | 5 (3.4)           | 7 (1.7)         | 0.209                 |

Number (%); Mean ± SD

**SUPPLEMENTAL TABLE E. Multivariate analysis by Cox proportional hazards regression model for survival and mortality of all 2,536 patients with papillary thyroid carcinoma .**

|                                                                         | $\beta$ coefficient | Hazard ratio | 95% confidence interval |             | <i>p</i> value |
|-------------------------------------------------------------------------|---------------------|--------------|-------------------------|-------------|----------------|
|                                                                         |                     |              | Lower bound             | Upper bound |                |
| Age (year)                                                              | 0.014               | 1.014        | 1.011                   | 1.017       | 0.0000         |
| Sex (Female vs. Male)                                                   | 0.141               | 1.151        | 1.038                   | 1.277       | 0.0078         |
| Tumor size (cm)                                                         | -0.090              | 0.914        | 0.886                   | 0.942       | 0.0000         |
| Post-operative serum Tg level after 1 month (ng/mL)                     | 0.000               | 1.000        | 1.000                   | 1.000       | 0.6728         |
| Metastases (lymph node vs. soft tissue invasion vs. distant metastases) | -0.039              | 0.962        | 0.917                   | 1.009       | 0.1076         |
| Solitary vs. Multifocal PTC*                                            | 0.499               | 1.646        | 1.493                   | 1.815       | 0.0000         |

PTC\*: papillary thyroid carcinoma

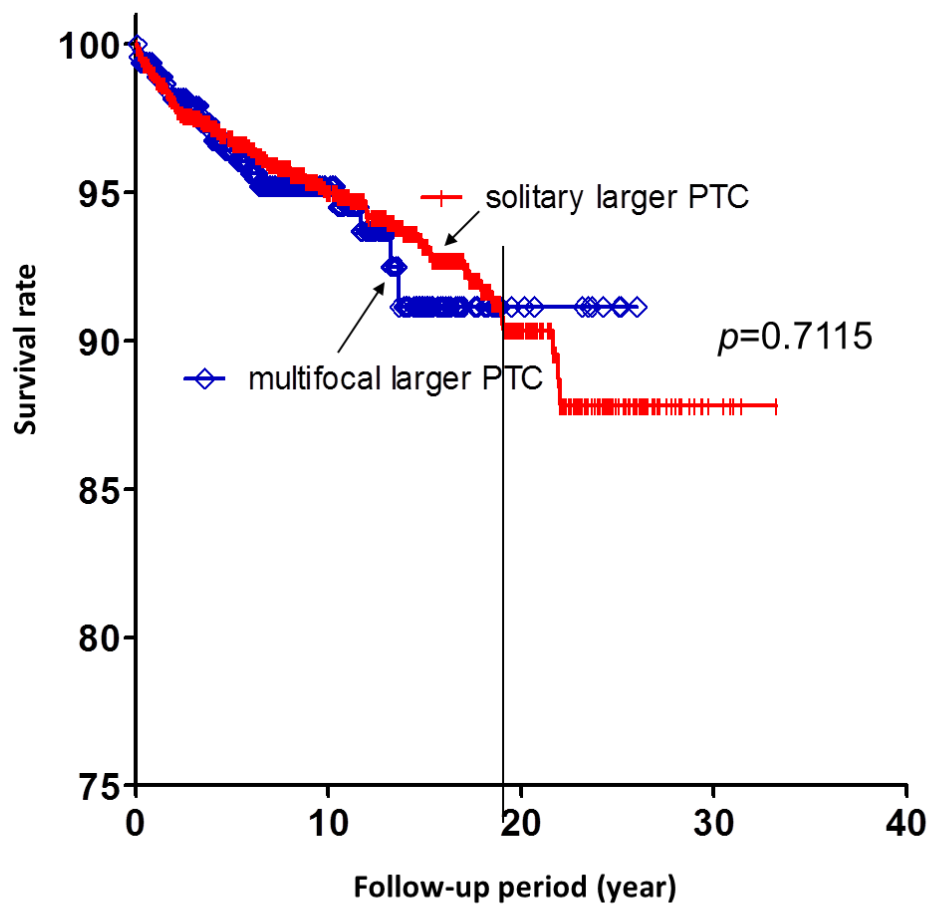

Supplemental Figure A
